# Supplementary material for: Second‐trimester transvaginal ultrasound measurement of cervical length for prediction of preterm birth: a blinded prospective multicentre diagnostic accuracy study
Source: PubMed Central journal article supplement (PMC7821210; doi:10.1111/1471-0528.16519), 2020-10-19
Supplement: BJO-128-195-s001.pdf [file BJO-128-195-s001.pdf]

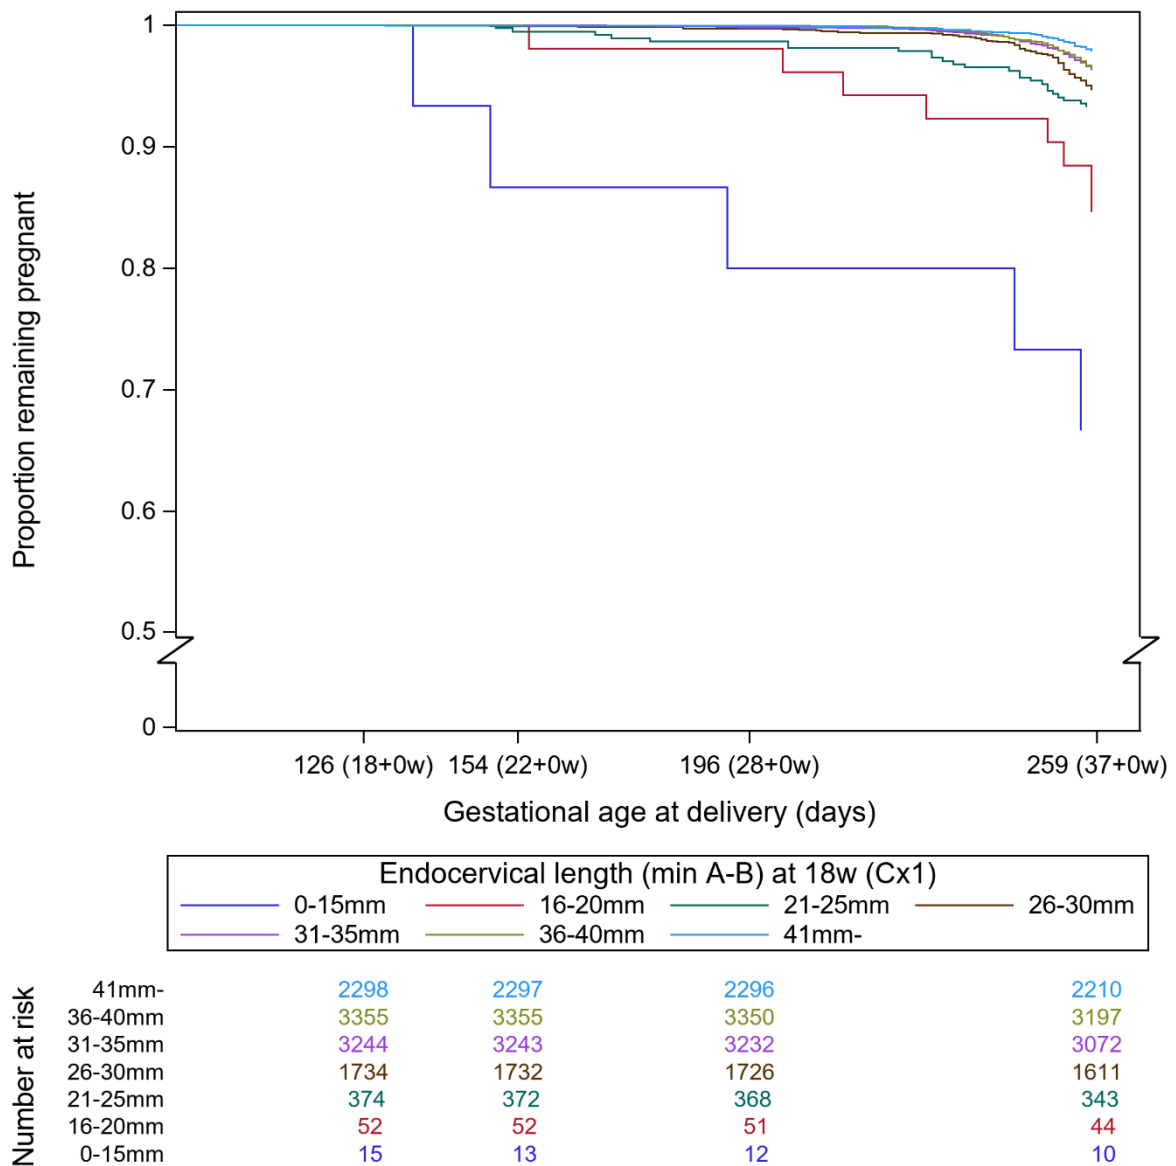

**Figure S1.** Kaplan-Meier plot showing the proportion of women still pregnant at different gestational ages before 37+0 weeks in relation to shortest endocervical length at 18 weeks+0 days to 20 weeks+6 days (Cx1). Women with indicated preterm delivery are censored. w = gestational weeks.
