# Supplementary material for: Second‐trimester transvaginal ultrasound measurement of cervical length for prediction of preterm birth: a blinded prospective multicentre diagnostic accuracy study
Source: PubMed Central journal article supplement (PMC7821210; doi:10.1111/1471-0528.16519), 2020-10-19
Supplement: BJO-128-195-s004.pdf [file BJO-128-195-s004.pdf]

**Table S2.** Pregnancy, delivery and neonatal outcome by study groups

| Variable                                                                             | Study groups                                            |                                                        |                                                                         |                                                     |                                                    |
|--------------------------------------------------------------------------------------|---------------------------------------------------------|--------------------------------------------------------|-------------------------------------------------------------------------|-----------------------------------------------------|----------------------------------------------------|
|                                                                                      | Cx1<br>(measurement<br>at 18+0-20+6<br>GW)<br>(n=11072) | Cx2<br>(measurement<br>at 21+0-23+6<br>GW)<br>(n=6288) | Cx1Cx2<br>(measurement at<br>18+0-20+6 and<br>21+0-23+6 GW)<br>(n=6179) | No cervix<br>measurement<br>(decliners)<br>(n=9799) | Swedish<br>background<br>population<br>(n=347 479) |
| Redeemed prescription of vaginal progesterone after inclusion/18+0 GW until delivery | 18 (0.2%)                                               | 9 (0.1%)                                               | 8 (0.1%)                                                                | 0 (0.0%)                                            | 823 (0.2%)<br>n=340 999                            |
| Cerclage after inclusion/18+0 GW*                                                    | 1 (0.0%)                                                | 0 (0.0%)                                               | 0 (0.0%)                                                                | 0 (0.0%)                                            | 72 (0.0%)<br>n=340 999                             |
| Preeclampsia or gestational hypertension at delivery                                 | 619 (5.6%)                                              | 368 (5.9%)                                             | 359 (5.8%)                                                              | 534 (5.4%)                                          | 16 988 (4.9%)                                      |
| Chronic hypertension at delivery                                                     | 73 (0.7%)                                               | 39 (0.6%)                                              | 37 (0.6%)                                                               | 48 (0.5%)                                           | 1964 (0.6%)                                        |
| Diabetes type 1, 2 or gestational diabetes at delivery                               | 271 (2.4%)                                              | 171 (2.7%)                                             | 169 (2.7%)                                                              | 201 (2.1%)                                          | 7054 (2.0%)                                        |
| Induction of labour                                                                  | 1946 (17.6%)                                            | 1090 (17.3%)                                           | 1066 (17.3%)                                                            | 1591 (16.2%)                                        | 59 360 (17.1%)                                     |
| Caesarean delivery                                                                   | 1704 (15.5%)                                            | 944 (15.1%)                                            | 923 (15.0%)                                                             | 1475 (15.2%)                                        | 60 113 (17.3%)                                     |
| Gestational age at birth (days)                                                      | 277.8 (13.2)<br>280.0<br>(273; 286)<br>n=11 072         | 278.0 (12.2)<br>280.0<br>(273; 286)<br>n=6288          | 278.0 (12.1)<br>280.0<br>(273; 286)<br>n=6179                           | 278.4 (12.4)<br>280.0<br>(273; 286)<br>n=9799       | 277.9 (13.2)<br>280.0<br>(273; 286)<br>n=347 479   |
| Late miscarriage† (before 22+0 GW)                                                   | 8 (0.1%)                                                | 0 (0.0%)                                               | 0 (0.0%)                                                                | 7 (0.1%)                                            | NA                                                 |
| Spontaneous late miscarriage (before 22+0 GW)                                        | 7 (0.1%)                                                | 0 (0.0%)                                               | 0 (0.0%)                                                                | 4 (0.0%)                                            | NA                                                 |
| PTB <33 GW‡                                                                          | 109 (1.0%)                                              | 53 (0.8%)                                              | 52 (0.8%)                                                               | 72 (0.7%)                                           | 3767 (1.1%)                                        |
| PTB <37 GW‡                                                                          | 577 (5.2%)                                              | 321 (5.1%)                                             | 313 (5.1%)                                                              | 412 (4.2%)                                          | 18 108 (5.2%)                                      |
| Spontaneous PTB <28 GW‡                                                              | 15 (0.1%)                                               | 3 (0.0%)                                               | 3 (0.0%)                                                                | 18 (0.2%)                                           | 682 (0.2%)                                         |
| Spontaneous PTB <29 GW‡                                                              | 17 (0.2%)                                               | 5 (0.1%)                                               | 5 (0.1%)                                                                | 19 (0.2%)                                           | 816 (0.2%)                                         |
| Spontaneous PTB <30 GW‡                                                              | 27 (0.2%)                                               | 10 (0.2%)                                              | 10 (0.2%)                                                               | 25 (0.3%)                                           | 993 (0.3%)                                         |
| Spontaneous PTB <31 GW‡                                                              | 33 (0.3%)                                               | 15 (0.2%)                                              | 15 (0.2%)                                                               | 30 (0.3%)                                           | 1224 (0.4%)                                        |
| Spontaneous PTB <32 GW‡                                                              | 39 (0.4%)                                               | 18 (0.3%)                                              | 18 (0.3%)                                                               | 36 (0.4%)                                           | 1521 (0.4%)                                        |
| Spontaneous PTB <33 GW‡                                                              | 56 (0.5%)                                               | 26 (0.4%)                                              | 26 (0.4%)                                                               | 42 (0.4%)                                           | 1958 (0.6%)                                        |
| Spontaneous PTB <34 GW‡                                                              | 87 (0.8%)                                               | 41 (0.7%)                                              | 40 (0.6%)                                                               | 58 (0.6%)                                           | 2732 (0.8%)                                        |
| Spontaneous PTB <35 GW‡                                                              | 136 (1.2%)                                              | 69 (1.1%)                                              | 67 (1.1%)                                                               | 102 (1.0%)                                          | 4038 (1.2%)                                        |
| Spontaneous PTB <36 GW‡                                                              | 219 (2.0%)                                              | 114 (1.8%)                                             | 109 (1.8%)                                                              | 164 (1.7%)                                          | 6324 (1.8%)                                        |
| Spontaneous PTB <37 GW‡                                                              | 410 (3.7%)                                              | 225 (3.6%)                                             | 220 (3.6%)                                                              | 293 (3.0%)                                          | 10 967 (3.2%)                                      |
| Birth weight (g)                                                                     | 3556 (548)<br>3570<br>(3240; 3905)<br>n=10 915          | 3569 (539)<br>3580<br>(3250; 3915)<br>n=6207           | 3569 (539)<br>3582<br>(3250; 3915)<br>n=6099                            | 3584 (538)<br>3590<br>(3270; 3925)<br>n=9704        | 3518 (566)<br>3530<br>(3200; 3870)<br>n=346 241    |
| Small for gestational age§                                                           | 285 (2.6%)                                              | 139 (2.2%)                                             | 138 (2.2%)                                                              | 243 (2.5%)                                          | 8319 (2.4%)                                        |
| Apgar score at 5 min <7                                                              | 155 (1.4%)                                              | 91 (1.4%)                                              | 89 (1.4%)                                                               | 125 (1.3%)                                          | 5228 (1.6%)                                        |
| Malformations¶                                                                       | 511 (4.6%)                                              | 282 (4.5%)                                             | 274 (4.4%)                                                              | 414 (4.2%)                                          | 14 839 (4.3%)                                      |
| Perinatal mortality**                                                                | 38 (0.3%)                                               | 17 (0.3%)                                              | 17 (0.3%)                                                               | 26 (0.3%)                                           | 1385 (0.4%)                                        |
| Stillbirth after 22+0 GW                                                             | 32 (0.3%)                                               | 15 (0.2%)                                              | 15 (0.2%)                                                               | 24 (0.2%)                                           | 1183 (0.3%)                                        |
| Neonatal death within 7 days after birth                                             | 6 (0.1%)                                                | 2 (0.0%)                                               | 2 (0.0%)                                                                | 2 (0.0%)                                            | 203 (0.1%)                                         |

For categorical variables n (%) is presented

For continuous variables Mean (SD) / Median / (25<sup>th</sup> percentile; 75<sup>th</sup> percentile) / n is presented

GW=gestational weeks, PTB=preterm birth

\* cerclage from 18+0 GW for Swedish background population

† includes one case of induction of labour for missed abortion

‡ PTB and spontaneous PTB include births from 22+0 GW

§ defined as  $\geq 2$  SDs below the Swedish gestational age- and sex-specific growth standard<sup>1</sup>

¶ malformation defined as a newborn with an International Classification of Diseases (ICD) -10 Q diagnosis registered at birth

\*\*includes stillbirth after 22+0 GW and neonatal death within 7 days after birth

#### **Reference**

1. Marsál K, Persson PH, Larsen T, Lilja H, Selbing A, Sultan B. Intrauterine growth curves based on ultrasonically estimated foetal weights. *Acta Paediatr.* 1996;85:843-8
