# Supplementary material for: Second‐trimester transvaginal ultrasound measurement of cervical length for prediction of preterm birth: a blinded prospective multicentre diagnostic accuracy study
Source: PubMed Central journal article supplement (PMC7821210; doi:10.1111/1471-0528.16519), 2020-10-19
Supplement: BJO-128-195-s005.pdf [file BJO-128-195-s005.pdf]

**Table S3.** Area under the Receiver Operating Characteristic curve for different cervical length measurements with regard to spontaneous preterm birth including late miscarriage at 18+0 to 21+6 weeks for the three study populations with cervical measurements at 18+0 to 20+6 weeks (Cx1), at 21+0 to 23+6 weeks (Cx2), and both at Cx1 and Cx2 (Cx1Cx2)

| Cervical measurement* | Area under the Receiver Operating Characteristic curve (95% confidence interval) |                      |                      |                      |                      |                      |                      |                      |                      |                      |
|-----------------------|----------------------------------------------------------------------------------|----------------------|----------------------|----------------------|----------------------|----------------------|----------------------|----------------------|----------------------|----------------------|
|                       | sPTB<br><28 GW                                                                   | sPTB<br><29 GW       | sPTB<br><30 GW       | sPTB<br><31 GW       | sPTB<br><32 GW       | sPTB<br><33 GW       | sPTB<br><34 GW       | sPTB<br><35 GW       | sPTB<br><36 GW       | sPTB<br><37 GW       |
| <b>Cx1 (n=11 072)</b> | <b>n=22</b>                                                                      | <b>n=24</b>          | <b>n=34</b>          | <b>n=40</b>          | <b>n=46</b>          | <b>n=63</b>          | <b>n=94</b>          | <b>n=143</b>         | <b>n=226</b>         | <b>n=417</b>         |
| Min A-B (Cx1)         | 0.83<br>(0.74; 0.92)                                                             | 0.84<br>(0.76; 0.92) | 0.77<br>(0.68; 0.87) | 0.76<br>(0.67; 0.85) | 0.71<br>(0.62; 0.80) | 0.68<br>(0.60; 0.76) | 0.65<br>(0.59; 0.71) | 0.62<br>(0.57; 0.67) | 0.61<br>(0.57; 0.65) | 0.60<br>(0.57; 0.63) |
| Mean A-B (Cx1)        | 0.82<br>(0.73; 0.90)                                                             | 0.83<br>(0.75; 0.91) | 0.77<br>(0.68; 0.86) | 0.75<br>(0.67; 0.84) | 0.71<br>(0.62; 0.80) | 0.68<br>(0.61; 0.76) | 0.65<br>(0.59; 0.71) | 0.62<br>(0.57; 0.66) | 0.61<br>(0.57; 0.65) | 0.60<br>(0.57; 0.62) |
| Max A-B (Cx1)         | 0.80<br>(0.71; 0.89)                                                             | 0.81<br>(0.73; 0.89) | 0.75<br>(0.66; 0.84) | 0.74<br>(0.65; 0.82) | 0.69<br>(0.61; 0.78) | 0.67<br>(0.60; 0.75) | 0.65<br>(0.59; 0.71) | 0.61<br>(0.57; 0.66) | 0.60<br>(0.57; 0.64) | 0.59<br>(0.56; 0.62) |
| Min A-C (Cx1)         | 0.83<br>(0.73; 0.92)                                                             | 0.84<br>(0.75; 0.93) | 0.77<br>(0.68; 0.86) | 0.76<br>(0.68; 0.85) | 0.71<br>(0.62; 0.81) | 0.69<br>(0.61; 0.77) | 0.65<br>(0.59; 0.72) | 0.62<br>(0.57; 0.67) | 0.60<br>(0.56; 0.64) | 0.59<br>(0.56; 0.62) |
| Mean A-C (Cx1)        | 0.82<br>(0.73; 0.92)                                                             | 0.84<br>(0.75; 0.93) | 0.77<br>(0.68; 0.86) | 0.76<br>(0.68; 0.85) | 0.71<br>(0.62; 0.80) | 0.69<br>(0.61; 0.77) | 0.66<br>(0.59; 0.72) | 0.62<br>(0.57; 0.67) | 0.60<br>(0.56; 0.64) | 0.59<br>(0.56; 0.62) |
| Max A-C (Cx1)         | 0.82<br>(0.72; 0.91)                                                             | 0.83<br>(0.74; 0.92) | 0.76<br>(0.67; 0.85) | 0.76<br>(0.67; 0.84) | 0.71<br>(0.61; 0.80) | 0.69<br>(0.61; 0.77) | 0.66<br>(0.59; 0.72) | 0.62<br>(0.57; 0.67) | 0.60<br>(0.56; 0.64) | 0.59<br>(0.59; 0.62) |
| Min A-B+B-C (Cx1)     | 0.83<br>(0.73; 0.93)                                                             | 0.84<br>(0.75; 0.93) | 0.77<br>(0.68; 0.87) | 0.77<br>(0.68; 0.95) | 0.71<br>(0.62; 0.81) | 0.69<br>(0.61; 0.77) | 0.65<br>(0.59; 0.72) | 0.61<br>(0.56; 0.66) | 0.59<br>(0.55; 0.63) | 0.59<br>(0.56; 0.62) |
| Mean A-B+B-C (Cx1)    | 0.82<br>(0.72; 0.91)                                                             | 0.83<br>(0.74; 0.92) | 0.76<br>(0.67; 0.86) | 0.76<br>(0.67; 0.84) | 0.71<br>(0.61; 0.80) | 0.69<br>(0.61; 0.77) | 0.65<br>(0.59; 0.72) | 0.61<br>(0.56; 0.66) | 0.59<br>(0.55; 0.63) | 0.59<br>(0.56; 0.61) |
| Max A-B+B-C (Cx1)     | 0.78<br>(0.67; 0.89)                                                             | 0.80<br>(0.69; 0.90) | 0.74<br>(0.64; 0.84) | 0.74<br>(0.64; 0.83) | 0.69<br>(0.59; 0.78) | 0.68<br>(0.60; 0.76) | 0.64<br>(0.58; 0.71) | 0.60<br>(0.55; 0.65) | 0.58<br>(0.54; 0.62) | 0.58<br>(0.55; 0.61) |
| <b>Cx2 (n=6288)</b>   | <b>n=3</b>                                                                       | <b>n=5</b>           | <b>n=10</b>          | <b>n=15</b>          | <b>n=18</b>          | <b>n=26</b>          | <b>n=41</b>          | <b>n=69</b>          | <b>n=114</b>         | <b>n=225</b>         |
| Min A-B (Cx2)         | 0.96<br>(0.92; 1.00)                                                             | 0.98<br>(0.95; 1.00) | 0.86<br>(0.69; 1.00) | 0.85<br>(0.71; 0.99) | 0.81<br>(0.68; 0.93) | 0.76<br>(0.65; 0.87) | 0.71<br>(0.63; 0.80) | 0.71<br>(0.65; 0.77) | 0.66<br>(0.61; 0.72) | 0.63<br>(0.59; 0.67) |
| Mean A-B (Cx2)        | 0.96<br>(0.93; 1.00)                                                             | 0.98<br>(0.95; 1.00) | 0.87<br>(0.69; 1.00) | 0.85<br>(0.72; 0.99) | 0.81<br>(0.69; 0.93) | 0.77<br>(0.66; 0.87) | 0.72<br>(0.64; 0.80) | 0.71<br>(0.65; 0.77) | 0.66<br>(0.61; 0.71) | 0.63<br>(0.59; 0.67) |
| Max A-B (Cx2)         | 0.96<br>(0.92; 1.00)                                                             | 0.98<br>(0.95; 1.00) | 0.87<br>(0.70; 1.00) | 0.86<br>(0.73; 0.99) | 0.82<br>(0.70; 0.93) | 0.77<br>(0.67; 0.87) | 0.73<br>(0.65; 0.81) | 0.71<br>(0.64; 0.77) | 0.66<br>(0.61; 0.71) | 0.62<br>(0.58; 0.66) |
| Min A-C (Cx2)         | 0.96<br>(0.93; 1.00)                                                             | 0.98<br>(0.95; 1.00) | 0.87<br>(0.71; 1.00) | 0.86<br>(0.73; 0.99) | 0.82<br>(0.71; 0.94) | 0.78<br>(0.68; 0.88) | 0.73<br>(0.66; 0.81) | 0.71<br>(0.65; 0.78) | 0.66<br>(0.61; 0.72) | 0.63<br>(0.60; 0.67) |
| Mean A-C (Cx2)        | 0.96<br>(0.93; 1.00)                                                             | 0.98<br>(0.95; 1.00) | 0.88<br>(0.71; 1.00) | 0.86<br>(0.74; 0.99) | 0.83<br>(0.71; 0.94) | 0.78<br>(0.69; 0.88) | 0.74<br>(0.67; 0.82) | 0.71<br>(0.65; 0.78) | 0.66<br>(0.61; 0.71) | 0.63<br>(0.59; 0.67) |

|                                               |                      |                      |                      |                      |                      |                      |                      |                      |                      |                      |
|-----------------------------------------------|----------------------|----------------------|----------------------|----------------------|----------------------|----------------------|----------------------|----------------------|----------------------|----------------------|
| Max A-C (Cx2)                                 | 0.96<br>(0.93; 1.00) | 0.98<br>(0.95; 1.00) | 0.88<br>(0.72; 1.00) | 0.87<br>(0.75; 0.99) | 0.83<br>(0.72; 0.94) | 0.79<br>(0.70; 0.88) | 0.75<br>(0.67; 0.82) | 0.71<br>(0.65; 0.78) | 0.66<br>(0.60; 0.71) | 0.63<br>(0.59; 0.67) |
| Min A-B+B-C (Cx2)                             | 0.96<br>(0.93; 1.00) | 0.98<br>(0.95; 1.00) | 0.87<br>(0.71; 1.00) | 0.86<br>(0.73; 0.99) | 0.82<br>(0.71; 0.94) | 0.78<br>(0.68; 0.88) | 0.74<br>(0.66; 0.81) | 0.71<br>(0.65; 0.78) | 0.67<br>(0.61; 0.72) | 0.63<br>(0.60; 0.67) |
| Mean A-B+B-C (Cx2)                            | 0.97<br>(0.93; 1.00) | 0.98<br>(0.96; 1.00) | 0.88<br>(0.72; 1.00) | 0.87<br>(0.74; 0.99) | 0.83<br>(0.72; 0.94) | 0.79<br>(0.69; 0.88) | 0.74<br>(0.67; 0.82) | 0.71<br>(0.65; 0.78) | 0.66<br>(0.61; 0.71) | 0.63<br>(0.59; 0.67) |
| Max A-B+B-C (Cx2)                             | 0.96<br>(0.93; 1.00) | 0.98<br>(0.95; 1.00) | 0.88<br>(0.72; 1.00) | 0.87<br>(0.75; 0.99) | 0.83<br>(0.72; 0.94) | 0.79<br>(0.70; 0.88) | 0.75<br>(0.68; 0.82) | 0.71<br>(0.65; 0.78) | 0.66<br>(0.60; 0.71) | 0.63<br>(0.59; 0.67) |
| <b>Cx1Cx2 (n=6179)</b>                        | <b>n=3</b>           | <b>n=5</b>           | <b>n=10</b>          | <b>n=15</b>          | <b>n=18</b>          | <b>n=26</b>          | <b>n=40</b>          | <b>n=67</b>          | <b>n=109</b>         | <b>n=220</b>         |
| Change Min A-B in mm between Cx1 and Cx2      | 0.54<br>(0.19; 0.90) | 0.68<br>(0.41; 0.94) | 0.71<br>(0.52; 0.91) | 0.69<br>(0.52; 0.86) | 0.69<br>(0.54; 0.84) | 0.67<br>(0.55; 0.79) | 0.60<br>(0.51; 0.70) | 0.63<br>(0.56; 0.69) | 0.58<br>(0.52; 0.63) | 0.56<br>(0.52; 0.60) |
| Change Mean A-B in mm between Cx1 and Cx2     | 0.66<br>(0.25; 1.00) | 0.75<br>(0.49; 1.00) | 0.76<br>(0.56; 0.95) | 0.72<br>(0.54; 0.89) | 0.72<br>(0.57; 0.87) | 0.68<br>(0.57; 0.80) | 0.62<br>(0.51; 0.71) | 0.63<br>(0.56; 0.70) | 0.58<br>(0.52; 0.63) | 0.55<br>(0.51; 0.59) |
| Change Max A-B in mm between Cx1 and Cx2      | 0.69<br>(0.26; 1.00) | 0.77<br>(0.51; 1.00) | 0.76<br>(0.58; 0.95) | 0.72<br>(0.55; 0.89) | 0.72<br>(0.57; 0.87) | 0.68<br>(0.56; 0.80) | 0.60<br>(0.51; 0.70) | 0.62<br>(0.55; 0.69) | 0.57<br>(0.51; 0.63) | 0.55<br>(0.51; 0.59) |
| Change Min A-C in mm between Cx1 and Cx2      | 0.65<br>(0.35; 0.96) | 0.71<br>(0.51; 0.91) | 0.70<br>(0.53; 0.87) | 0.67<br>(0.51; 0.82) | 0.68<br>(0.54; 0.83) | 0.65<br>(0.53; 0.77) | 0.62<br>(0.52; 0.72) | 0.61<br>(0.54; 0.68) | 0.56<br>(0.50; 0.62) | 0.54<br>(0.50; 0.58) |
| Change Mean A-C in mm between Cx1 and Cx2     | 0.73<br>(0.53; 0.93) | 0.76<br>(0.63; 0.89) | 0.73<br>(0.58; 0.88) | 0.68<br>(0.53; 0.83) | 0.70<br>(0.56; 0.83) | 0.66<br>(0.54; 0.77) | 0.62<br>(0.53; 0.71) | 0.61<br>(0.54; 0.68) | 0.56<br>(0.50; 0.62) | 0.53<br>(0.49; 0.57) |
| Change Max A-C in mm between Cx1 and Cx2      | 0.76<br>(0.60; 0.92) | 0.78<br>(0.67; 0.89) | 0.73<br>(0.59; 0.88) | 0.68<br>(0.54; 0.83) | 0.69<br>(0.56; 0.83) | 0.65<br>(0.54; 0.76) | 0.61<br>(0.52; 0.71) | 0.61<br>(0.54; 0.68) | 0.55<br>(0.59; 0.61) | 0.53<br>(0.49; 0.57) |
| Change Min A-B+B-C in mm between Cx1 and Cx2  | 0.65<br>(0.41; 0.89) | 0.71<br>(0.54; 0.87) | 0.70<br>(0.53; 0.86) | 0.66<br>(0.51; 0.82) | 0.68<br>(0.54; 0.82) | 0.65<br>(0.53; 0.76) | 0.62<br>(0.52; 0.71) | 0.61<br>(0.54; 0.68) | 0.56<br>(0.50; 0.62) | 0.54<br>(0.50; 0.58) |
| Change Mean A-B+B-C in mm between Cx1 and Cx2 | 0.77<br>(0.60; 0.94) | 0.78<br>(0.66; 0.90) | 0.73<br>(0.58; 0.88) | 0.68<br>(0.53; 0.83) | 0.70<br>(0.56; 0.83) | 0.66<br>(0.54; 0.77) | 0.62<br>(0.52; 0.71) | 0.61<br>(0.54; 0.68) | 0.56<br>(0.50; 0.61) | 0.53<br>(0.49; 0.57) |
| Change Max A-B+B-C in mm between Cx1 and Cx2  | 0.81<br>(0.65; 0.97) | 0.80<br>(0.69; 0.91) | 0.74<br>(0.59; 0.88) | 0.68<br>(0.54; 0.83) | 0.69<br>(0.56; 0.83) | 0.65<br>(0.54; 0.76) | 0.61<br>(0.52; 0.71) | 0.60<br>(0.53; 0.67) | 0.55<br>(0.49; 0.61) | 0.52<br>(0.48; 0.56) |
| % Change Min A-B between Cx1 and Cx2          | 0.55<br>(0.10; 1.00) | 0.72<br>(0.40; 1.00) | 0.74<br>(0.53; 0.96) | 0.71<br>(0.53; 0.90) | 0.71<br>(0.55; 0.87) | 0.68<br>(0.56; 0.81) | 0.62<br>(0.51; 0.72) | 0.64<br>(0.56; 0.71) | 0.58<br>(0.52; 0.64) | 0.56<br>(0.52; 0.60) |
| % Change Mean A-B between Cx1 and Cx2         | 0.66<br>(0.18; 1.00) | 0.78<br>(0.48; 1.00) | 0.78<br>(0.58; 0.99) | 0.74<br>(0.56; 0.92) | 0.73<br>(0.58; 0.89) | 0.70<br>(0.57; 0.82) | 0.62<br>(0.52; 0.72) | 0.64<br>(0.56; 0.71) | 0.58<br>(0.52; 0.64) | 0.56<br>(0.52; 0.60) |
| % Change Max A-B between Cx1 and Cx2          | 0.68<br>(0.20; 1.00) | 0.80<br>(0.50; 1.00) | 0.79<br>(0.59; 0.99) | 0.74<br>(0.56; 0.92) | 0.74<br>(0.58; 0.90) | 0.69<br>(0.57; 0.82) | 0.62<br>(0.51; 0.72) | 0.63<br>(0.56; 0.71) | 0.57<br>(0.51; 0.63) | 0.55<br>(0.51; 0.59) |
| % Change Min A-C between Cx1 and Cx2          | 0.69<br>(0.36; 1.00) | 0.78<br>(0.57; 1.00) | 0.76<br>(0.57; 0.94) | 0.71<br>(0.54; 0.88) | 0.72<br>(0.57; 0.87) | 0.68<br>(0.56; 0.81) | 0.64<br>(0.54; 0.75) | 0.63<br>(0.55; 0.70) | 0.57<br>(0.51; 0.63) | 0.54<br>(0.50; 0.58) |
| % Change Mean A-C between Cx1 and Cx2         | 0.78<br>(0.43; 0.97) | 0.84<br>(0.70; 0.98) | 0.79<br>(0.63; 0.96) | 0.73<br>(0.57; 0.90) | 0.74<br>(0.59; 0.88) | 0.69<br>(0.57; 0.81) | 0.65<br>(0.54; 0.75) | 0.63<br>(0.56; 0.70) | 0.57<br>(0.51; 0.63) | 0.54<br>(0.50; 0.58) |

|                                      |              |              |              |              |              |              |              |              |              |              |
|--------------------------------------|--------------|--------------|--------------|--------------|--------------|--------------|--------------|--------------|--------------|--------------|
| % Change Max A-C between Cx1 and Cx2 | 0.81         | 0.86         | 0.80         | 0.74         | 0.74         | 0.69         | 0.64         | 0.62         | 0.56         | 0.53         |
|                                      | (0.65; 0.97) | (0.75; 0.97) | (0.64; 0.96) | (0.58; 0.90) | (0.59; 0.89) | (0.56; 0.81) | (0.54; 0.74) | (0.55; 0.70) | (0.50; 0.62) | (0.49; 0.58) |

---

sPTB=spontaneous preterm birth; GW=gestational week

\*The endocervical length (distance A-B) was measured as a straight line from the external to the internal cervical os. If the isthmus was present, three distances were measured: the endocervical length (distance A-B), the isthmus length (distance B-C) and the distance A to C
