# Supplementary material for: Second‐trimester transvaginal ultrasound measurement of cervical length for prediction of preterm birth: a blinded prospective multicentre diagnostic accuracy study
Source: PubMed Central journal article supplement (PMC7821210; doi:10.1111/1471-0528.16519), 2020-10-19
Supplement: BJO-128-195-s006.pdf [file BJO-128-195-s006.pdf]

**Table S4.** Area under the Receiver Operating Characteristic curve for different cervical length measurements with regard to preterm birth <33 weeks excluding late miscarriage at 18+0 to 21+6 weeks (primary outcome) and with regard to preterm birth including late miscarriage at 18+0 to 21+6 weeks for the three study populations with cervical measurements at 18+0 to 20+6 weeks (Cx1), at 21+0 to 23+6 weeks (Cx2), and both at Cx1 and CX 2 (Cx1Cx2)

| Area under the Receiver Operating Characteristic curve (95% confidence interval) |                      |                      |                      |                      |                      |                      |                      |                      |                      |                      |                      |
|----------------------------------------------------------------------------------|----------------------|----------------------|----------------------|----------------------|----------------------|----------------------|----------------------|----------------------|----------------------|----------------------|----------------------|
| Cervical measurement*                                                            | Primary outcome      | PTB                  | PTB                  | PTB                  | PTB                  | PTB                  | PTB                  | PTB                  | PTB                  | PTB                  | PTB                  |
|                                                                                  | <33 GW†              | <28 GW               | <29 GW               | <30 GW               | <31 GW               | <32 GW               | <33 GW               | <34 GW               | <35 GW               | <36 GW               | <37 GW               |
| <b>Cx1 (n=11 072)</b>                                                            | <b>n=109</b>         | <b>n=37</b>          | <b>n=44</b>          | <b>n=59</b>          | <b>n=70</b>          | <b>n=87</b>          | <b>n=117</b>         | <b>n=158</b>         | <b>n=232</b>         | <b>n=338</b>         | <b>n=585</b>         |
| Min A-B (Cx1)                                                                    | 0.57<br>(0.51; 0.63) | 0.73<br>(0.65; 0.82) | 0.73<br>(0.65; 0.81) | 0.68<br>(0.60; 0.76) | 0.67<br>(0.59; 0.74) | 0.63<br>(0.56; 0.69) | 0.59<br>(0.53; 0.65) | 0.59<br>(0.54; 0.63) | 0.57<br>(0.54; 0.61) | 0.58<br>(0.55; 0.61) | 0.57<br>(0.55; 0.60) |
| Mean A-B (Cx1)                                                                   | 0.58<br>(0.52; 0.64) | 0.73<br>(0.65; 0.81) | 0.73<br>(0.65; 0.81) | 0.68<br>(0.60; 0.76) | 0.66<br>(0.59; 0.74) | 0.63<br>(0.56; 0.69) | 0.59<br>(0.54; 0.65) | 0.59<br>(0.54; 0.64) | 0.58<br>(0.54; 0.61) | 0.58<br>(0.55; 0.61) | 0.57<br>(0.55; 0.60) |
| Max A-B (Cx1)                                                                    | 0.57<br>(0.51; 0.63) | 0.72<br>(0.65; 0.80) | 0.72<br>(0.64; 0.80) | 0.66<br>(0.59; 0.74) | 0.65<br>(0.58; 0.72) | 0.62<br>(0.55; 0.69) | 0.59<br>(0.53; 0.65) | 0.59<br>(0.54; 0.63) | 0.57<br>(0.53; 0.61) | 0.58<br>(0.55; 0.61) | 0.57<br>(0.55; 0.60) |
| Min A-C (Cx1)                                                                    | 0.60<br>(0.54; 0.66) | 0.74<br>(0.65; 0.82) | 0.74<br>(0.66; 0.82) | 0.69<br>(0.61; 0.77) | 0.68<br>(0.61; 0.75) | 0.65<br>(0.58; 0.72) | 0.62<br>(0.56; 0.68) | 0.60<br>(0.55; 0.65) | 0.59<br>(0.55; 0.63) | 0.59<br>(0.55; 0.62) | 0.58<br>(0.56; 0.61) |
| Mean A-C (Cx1)                                                                   | 0.60<br>(0.54; 0.66) | 0.74<br>(0.65; 0.82) | 0.74<br>(0.66; 0.82) | 0.69<br>(0.61; 0.77) | 0.68<br>(0.61; 0.76) | 0.65<br>(0.59; 0.72) | 0.62<br>(0.56; 0.68) | 0.61<br>(0.56; 0.66) | 0.59<br>(0.56; 0.63) | 0.59<br>(0.55; 0.62) | 0.58<br>(0.55; 0.60) |
| Max A-C (Cx1)                                                                    | 0.60<br>(0.54; 0.66) | 0.74<br>(0.65; 0.82) | 0.74<br>(0.66; 0.82) | 0.68<br>(0.60; 0.76) | 0.68<br>(0.61; 0.75) | 0.65<br>(0.58; 0.72) | 0.62<br>(0.56; 0.68) | 0.61<br>(0.56; 0.66) | 0.59<br>(0.55; 0.63) | 0.59<br>(0.55; 0.62) | 0.58<br>(0.55; 0.60) |
| Min A-B+B-C (Cx1)                                                                | 0.60<br>(0.54; 0.66) | 0.74<br>(0.65; 0.83) | 0.74<br>(0.66; 0.82) | 0.69<br>(0.61; 0.77) | 0.68<br>(0.61; 0.76) | 0.65<br>(0.58; 0.72) | 0.62<br>(0.56; 0.68) | 0.60<br>(0.55; 0.65) | 0.59<br>(0.55; 0.63) | 0.58<br>(0.55; 0.62) | 0.58<br>(0.55; 0.60) |
| Mean A-B+B-C (Cx1)                                                               | 0.60<br>(0.54; 0.66) | 0.73<br>(0.65; 0.82) | 0.74<br>(0.66; 0.82) | 0.68<br>(0.61; 0.76) | 0.68<br>(0.61; 0.75) | 0.65<br>(0.58; 0.72) | 0.62<br>(0.56; 0.68) | 0.61<br>(0.56; 0.66) | 0.59<br>(0.55; 0.63) | 0.58<br>(0.55; 0.62) | 0.58<br>(0.55; 0.60) |
| Max A-B+B-C (Cx1)                                                                | 0.60<br>(0.54; 0.66) | 0.72<br>(0.62; 0.81) | 0.72<br>(0.64; 0.80) | 0.67<br>(0.59; 0.75) | 0.67<br>(0.60; 0.74) | 0.64<br>(0.58; 0.71) | 0.62<br>(0.56; 0.67) | 0.60<br>(0.55; 0.65) | 0.59<br>(0.55; 0.62) | 0.58<br>(0.55; 0.61) | 0.57<br>(0.55; 0.60) |
| <b>Cx2 (n = 6288)</b>                                                            | <b>n=53</b>          | <b>n=10</b>          | <b>n=14</b>          | <b>n=22</b>          | <b>n=29</b>          | <b>n=39</b>          | <b>n=53</b>          | <b>n=74</b>          | <b>n=119</b>         | <b>n=178</b>         | <b>n=321</b>         |
| Min A-B (Cx2)                                                                    | 0.59<br>(0.50; 0.68) | 0.57<br>(0.32; 0.82) | 0.69<br>(0.49; 0.89) | 0.62<br>(0.44; 0.79) | 0.64<br>(0.50; 0.78) | 0.61<br>(0.50; 0.72) | 0.59<br>(0.50; 0.68) | 0.61<br>(0.54; 0.68) | 0.63<br>(0.57; 0.68) | 0.62<br>(0.57; 0.66) | 0.60<br>(0.57; 0.64) |
| Mean A-B (Cx2)                                                                   | 0.59<br>(0.51; 0.68) | 0.57<br>(0.32; 0.82) | 0.69<br>(0.48; 0.89) | 0.62<br>(0.44; 0.79) | 0.64<br>(0.50; 0.78) | 0.61<br>(0.50; 0.72) | 0.59<br>(0.51; 0.68) | 0.62<br>(0.55; 0.69) | 0.63<br>(0.57; 0.68) | 0.61<br>(0.57; 0.66) | 0.60<br>(0.57; 0.63) |

|                                               |                      |                      |                      |                      |                      |                      |                      |                      |                      |                      |                      |
|-----------------------------------------------|----------------------|----------------------|----------------------|----------------------|----------------------|----------------------|----------------------|----------------------|----------------------|----------------------|----------------------|
| Max A-B (Cx2)                                 | 0.59<br>(0.50; 0.68) | 0.55<br>(0.31; 0.79) | 0.67<br>(0.47; 0.87) | 0.61<br>(0.44; 0.78) | 0.63<br>(0.49; 0.77) | 0.61<br>(0.50; 0.71) | 0.59<br>(0.50; 0.68) | 0.62<br>(0.55; 0.69) | 0.62<br>(0.57; 0.68) | 0.61<br>(0.57; 0.66) | 0.60<br>(0.56; 0.63) |
| Min A-C (Cx2)                                 | 0.59<br>(0.50; 0.68) | 0.50<br>(0.24; 0.76) | 0.64<br>(0.42; 0.86) | 0.59<br>(0.42; 0.77) | 0.62<br>(0.47; 0.76) | 0.60<br>(0.49; 0.71) | 0.59<br>(0.50; 0.68) | 0.62<br>(0.55; 0.69) | 0.63<br>(0.57; 0.68) | 0.62<br>(0.57; 0.66) | 0.61<br>(0.57; 0.64) |
| Mean A-C (Cx2)                                | 0.59<br>(0.50; 0.68) | 0.51<br>(0.25; 0.77) | 0.63<br>(0.41; 0.77) | 0.59<br>(0.42; 0.68) | 0.62<br>(0.47; 0.76) | 0.60<br>(0.49; 0.74) | 0.59<br>(0.50; 0.68) | 0.62<br>(0.55; 0.69) | 0.63<br>(0.58; 0.69) | 0.62<br>(0.57; 0.66) | 0.60<br>(0.57; 0.64) |
| Max A-C (Cx2)                                 | 0.59<br>(0.50; 0.68) | 0.52<br>(0.27; 0.78) | 0.62<br>(0.40; 0.84) | 0.59<br>(0.41; 0.76) | 0.61<br>(0.47; 0.76) | 0.60<br>(0.49; 0.71) | 0.59<br>(0.50; 0.68) | 0.62<br>(0.55; 0.69) | 0.63<br>(0.57; 0.68) | 0.61<br>(0.57; 0.66) | 0.60<br>(0.57; 0.63) |
| Min A-B+B-C (Cx2)                             | 0.59<br>(0.50; 0.68) | 0.50<br>(0.24; 0.76) | 0.64<br>(0.42; 0.86) | 0.59<br>(0.42; 0.77) | 0.61<br>(0.47; 0.76) | 0.60<br>(0.49; 0.71) | 0.59<br>(0.50; 0.68) | 0.62<br>(0.55; 0.69) | 0.63<br>(0.57; 0.68) | 0.62<br>(0.57; 0.66) | 0.61<br>(0.57; 0.64) |
| Mean A-B+B-C (Cx2)                            | 0.59<br>(0.50; 0.68) | 0.50<br>(0.24; 0.77) | 0.63<br>(0.42; 0.85) | 0.59<br>(0.42; 0.77) | 0.62<br>(0.47; 0.76) | 0.60<br>(0.49; 0.72) | 0.59<br>(0.50; 0.68) | 0.62<br>(0.55; 0.69) | 0.63<br>(0.57; 0.69) | 0.62<br>(0.57; 0.66) | 0.60<br>(0.57; 0.64) |
| Max A-B+B-C (Cx2)                             | 0.59<br>(0.50; 0.68) | 0.52<br>(0.27; 0.77) | 0.62<br>(0.41; 0.84) | 0.59<br>(0.42; 0.76) | 0.61<br>(0.47; 0.76) | 0.60<br>(0.49; 0.71) | 0.59<br>(0.50; 0.68) | 0.62<br>(0.55; 0.69) | 0.63<br>(0.57; 0.68) | 0.61<br>(0.57; 0.66) | 0.60<br>(0.57; 0.63) |
| <b>Cx1Cx2 (n=6179)</b>                        | <b>n=52</b>          | <b>n=9</b>           | <b>n=13</b>          | <b>n=21</b>          | <b>n=28</b>          | <b>n=38</b>          | <b>n=52</b>          | <b>n=71</b>          | <b>n=115</b>         | <b>n=171</b>         | <b>n=313</b>         |
| Change Min A-B in mm between Cx1 and Cx2      | 0.60<br>(0.52; 0.69) | 0.63<br>(0.42; 0.85) | 0.49<br>(0.29; 0.68) | 0.51<br>(0.36; 0.67) | 0.55<br>(0.42; 0.69) | 0.58<br>(0.47; 0.68) | 0.60<br>(0.52; 0.69) | 0.58<br>(0.51; 0.66) | 0.59<br>(0.54; 0.64) | 0.56<br>(0.51; 0.60) | 0.55<br>(0.52; 0.59) |
| Change Mean A-B in mm between Cx1 and Cx2     | 0.61<br>(0.52; 0.70) | 0.62<br>(0.37; 0.86) | 0.50<br>(0.30; 0.71) | 0.53<br>(0.37; 0.69) | 0.56<br>(0.43; 0.70) | 0.58<br>(0.47; 0.69) | 0.61<br>(0.52; 0.70) | 0.59<br>(0.51; 0.66) | 0.59<br>(0.53; 0.65) | 0.55<br>(0.51; 0.60) | 0.55<br>(0.51; 0.58) |
| Change Max A-B in mm between Cx1 and Cx2      | 0.60<br>(0.51; 0.69) | 0.62<br>(0.37; 0.87) | 0.51<br>(0.30; 0.72) | 0.54<br>(0.38; 0.70) | 0.56<br>(0.43; 0.70) | 0.58<br>(0.47; 0.68) | 0.60<br>(0.51; 0.69) | 0.58<br>(0.51; 0.65) | 0.59<br>(0.53; 0.64) | 0.55<br>(0.50; 0.60) | 0.54<br>(0.51; 0.57) |
| Change Min A-C in mm between Cx1 and Cx2      | 0.56<br>(0.48; 0.65) | 0.67<br>(0.46; 0.87) | 0.56<br>(0.38; 0.74) | 0.53<br>(0.38; 0.67) | 0.53<br>(0.40; 0.66) | 0.55<br>(0.44; 0.65) | 0.56<br>(0.48; 0.65) | 0.56<br>(0.49; 0.63) | 0.56<br>(0.51; 0.62) | 0.53<br>(0.49; 0.58) | 0.53<br>(0.49; 0.56) |
| Change Mean A-C in mm between Cx1 and Cx2     | 0.57<br>(0.48; 0.65) | 0.64<br>(0.42; 0.87) | 0.54<br>(0.35; 0.73) | 0.55<br>(0.41; 0.70) | 0.54<br>(0.42; 0.67) | 0.56<br>(0.45; 0.66) | 0.57<br>(0.48; 0.65) | 0.57<br>(0.49; 0.64) | 0.56<br>(0.51; 0.62) | 0.53<br>(0.49; 0.58) | 0.52<br>(0.49; 0.56) |
| Change Max A-C in mm between Cx1 and Cx2      | 0.57<br>(0.48; 0.65) | 0.63<br>(0.39; 0.87) | 0.53<br>(0.33; 0.72) | 0.57<br>(0.42; 0.72) | 0.56<br>(0.43; 0.68) | 0.56<br>(0.46; 0.66) | 0.57<br>(0.48; 0.65) | 0.56<br>(0.49; 0.64) | 0.56<br>(0.51; 0.62) | 0.53<br>(0.49; 0.58) | 0.52<br>(0.49; 0.55) |
| Change Min A-B+B-C in mm between Cx1 and Cx2  | 0.57<br>(0.49; 0.65) | 0.66<br>(0.45; 0.86) | 0.55<br>(0.37; 0.73) | 0.56<br>(0.41; 0.70) | 0.55<br>(0.42; 0.67) | 0.56<br>(0.46; 0.66) | 0.57<br>(0.49; 0.65) | 0.57<br>(0.50; 0.64) | 0.57<br>(0.51; 0.62) | 0.54<br>(0.49; 0.58) | 0.53<br>(0.50; 0.56) |
| Change Mean A-B+B-C in mm between Cx1 and Cx2 | 0.57<br>(0.49; 0.66) | 0.62<br>(0.38; 0.86) | 0.53<br>(0.33; 0.72) | 0.58<br>(0.43; 0.73) | 0.56<br>(0.43; 0.69) | 0.57<br>(0.46; 0.57) | 0.57<br>(0.49; 0.66) | 0.57<br>(0.50; 0.64) | 0.57<br>(0.51; 0.62) | 0.53<br>(0.49; 0.58) | 0.52<br>(0.49; 0.55) |
| Change Max A-B+B-C in mm between Cx1 and Cx2  | 0.57<br>(0.48; 0.65) | 0.61<br>(0.35; 0.87) | 0.52<br>(0.32; 0.72) | 0.59<br>(0.44; 0.74) | 0.56<br>(0.43; 0.70) | 0.56<br>(0.46; 0.67) | 0.57<br>(0.48; 0.65) | 0.56<br>(0.49; 0.63) | 0.56<br>(0.51; 0.61) | 0.53<br>(0.48; 0.57) | 0.52<br>(0.48; 0.55) |
| % Change Min A-B between Cx1 and Cx2          | 0.61<br>(0.52; 0.70) | 0.63<br>(0.40; 0.86) | 0.50<br>(0.29; 0.71) | 0.53<br>(0.37; 0.70) | 0.57<br>(0.43; 0.71) | 0.58<br>(0.47; 0.69) | 0.61<br>(0.52; 0.70) | 0.59<br>(0.52; 0.66) | 0.60<br>(0.54; 0.65) | 0.56<br>(0.51; 0.61) | 0.56<br>(0.52; 0.59) |

|                                       |                      |                      |                      |                      |                      |                      |                      |                      |                      |                      |                      |
|---------------------------------------|----------------------|----------------------|----------------------|----------------------|----------------------|----------------------|----------------------|----------------------|----------------------|----------------------|----------------------|
| % Change Mean A-B between Cx1 and Cx2 | 0.61<br>(0.52; 0.70) | 0.61<br>(0.36; .86)  | 0.52<br>(0.30; 0.74) | 0.55<br>(0.38; 0.72) | 0.58<br>(0.44; 0.72) | 0.59<br>(0.48; 0.70) | 0.61<br>(0.52; 0.70) | 0.59<br>(0.52; 0.67) | 0.60<br>(0.54; 0.66) | 0.56<br>(0.51; 0.61) | 0.55<br>(0.52; 0.58) |
| % Change Max A-B between Cx1 and Cx2  | 0.61<br>(0.52; 0.70) | 0.61<br>(0.35; 0.87) | 0.53<br>(0.31; 0.75) | 0.56<br>(0.40; 0.73) | 0.58<br>(0.44; 0.72) | 0.59<br>(0.48; 0.70) | 0.61<br>(0.52; 0.70) | 0.59<br>(0.51; 0.66) | 0.59<br>(0.54; 0.65) | 0.55<br>(0.51; 0.60) | 0.54<br>(0.51; 0.58) |
| % Change Min A-C between Cx1 and Cx2  | 0.57<br>(0.48; 0.66) | 0.66<br>(0.44; 0.87) | 0.47<br>(0.26; 0.67) | 0.55<br>(0.39; 0.71) | 0.55<br>(0.41; 0.69) | 0.56<br>(0.45; 0.67) | 0.57<br>(0.48; 0.66) | 0.57<br>(0.50; 0.65) | 0.57<br>(0.52; 0.63) | 0.54<br>(0.50; 0.59) | 0.53<br>(0.50; 0.57) |
| % Change Mean A-C between Cx1 and Cx2 | 0.58<br>(0.49; 0.67) | 0.63<br>(0.40; 0.87) | 0.52<br>(0.31; 0.72) | 0.57<br>(0.42; 0.73) | 0.57<br>(0.43; 0.70) | 0.57<br>(0.46; 0.68) | 0.58<br>(0.49; 0.67) | 0.58<br>(0.50; 0.65) | 0.58<br>(0.52; 0.63) | 0.54<br>(0.50; 0.59) | 0.53<br>(0.50; 0.56) |
| % Change Max A-C between Cx1 and Cx2  | 0.58<br>(0.49; 0.67) | 0.63<br>(0.38; 0.88) | 0.50<br>(0.29; 0.71) | 0.59<br>(0.43; 0.75) | 0.58<br>(0.44; 0.71) | 0.57<br>(0.46; 0.68) | 0.58<br>(0.49; 0.67) | 0.57<br>(0.50; 0.65) | 0.57<br>(0.52; 0.63) | 0.54<br>(0.49; 0.59) | 0.52<br>(0.49; 0.56) |

PTB=preterm birth; GW=gestational week

\* The endocervical length (distance A-B) was measured as a straight line from the external to the internal cervical os. If the isthmus was present, three distances were measured: the endocervical length (distance A-B), the isthmus length (distance B-C) and the distance A to C

† late miscarriage at 18+0 to 21+6 weeks excluded
