# Supplementary material for: Second‐trimester transvaginal ultrasound measurement of cervical length for prediction of preterm birth: a blinded prospective multicentre diagnostic accuracy study
Source: PubMed Central journal article supplement (PMC7821210; doi:10.1111/1471-0528.16519), 2020-10-19
Supplement: BJO-128-195-s007.pdf [file BJO-128-195-s007.pdf]

**Table S5.** Area under the Receiver Operating Characteristic curve for different cervical length measurements at 18+0 to 20+6 GW (Cx1, n=11072) for prediction of preterm birth or spontaneous preterm birth <32, <33 and <34 gestational weeks in women with versus without isthmus

| Cervical length measurement‡ | Area under the Receiver Operating Characteristic curve (95% confidence interval) |                           |                                |                           |                                |                           |                                |                           |
|------------------------------|----------------------------------------------------------------------------------|---------------------------|--------------------------------|---------------------------|--------------------------------|---------------------------|--------------------------------|---------------------------|
|                              | Birth <33+0 GW*<br>(primary outcome)                                             |                           | Spontaneous birth<br><32+0 GW† |                           | Spontaneous birth<br><33+0 GW† |                           | Spontaneous birth<br><34+0 GW† |                           |
|                              | Isthmus present<br>(n=19§)                                                       | Isthmus absent<br>(n=90§) | Isthmus present<br>(n=9§)      | Isthmus absent<br>(n=37§) | Isthmus present<br>(n=12§)     | Isthmus absent<br>(n=51§) | Isthmus present<br>(n=20§)     | Isthmus absent<br>(n=74§) |
| Min A-B                      | 0.59<br>(0.42; 0.78)                                                             | 0.74<br>(0.67; 0.82)      | 0.51<br>(0.24; 0.78)           | 0.76<br>(0.67; 0.85)      | 0.57<br>(0.35; 0.79)           | 0.74<br>(0.67; 0.82)      | 0.51<br>(0.36; 0.66)           | 0.70<br>(0.63; 0.76)      |
| Mean A-B                     | 0.60<br>(0.44; 0.76)                                                             | 0.62<br>(0.56; 0.68)      | 0.51<br>(0.26; 0.77)           | 0.76<br>(0.67; 0.85)      | 0.59<br>(0.38; 0.79)           | 0.75<br>(0.67; 0.82)      | 0.49<br>(0.35; 0.64)           | 0.70<br>(0.64; 0.76)      |
| Max A-B                      | 0.61<br>(0.46; 0.76)                                                             | 0.61<br>(0.55; 0.68)      | 0.55<br>(0.32; 0.79)           | 0.76<br>(0.67; 0.84)      | 0.61<br>(0.42; 0.80)           | 0.74<br>(0.67; 0.81)      | 0.52<br>(0.39; 0.66)           | 0.70<br>(0.64; 0.76)      |
| Min A-C                      | 0.57<br>(0.42; 0.71)                                                             | 0.74<br>(0.67; 0.82)      | 0.52<br>(0.27; 0.76)           | 0.76<br>(0.67; 0.85)      | 0.56<br>(0.35; 0.77)           | 0.74<br>(0.67; 0.82)      | 0.51<br>(0.34; 0.67)           | 0.70<br>(0.63; 0.76)      |
| Mean A-C                     | 0.56<br>(0.42; 0.71)                                                             | 0.62<br>(0.56; 0.68)      | 0.50<br>(0.26; 0.75)           | 0.76<br>(0.67; 0.85)      | 0.57<br>(0.36; 0.78)           | 0.75<br>(0.67; 0.82)      | 0.51<br>(0.34; 0.67)           | 0.70<br>(0.64; 0.76)      |
| Max A-C                      | 0.56<br>(0.41; 0.71)                                                             | 0.61<br>(0.55; 0.68)      | 0.49<br>(0.24; 0.74)           | 0.76<br>(0.67; 0.84)      | 0.57<br>(0.36; 0.78)           | 0.74<br>(0.67; 0.81)      | 0.51<br>(0.34; 0.68)           | 0.70<br>(0.64; 0.76)      |
| Min A-B + B-C                | 0.60<br>(0.45; 0.75)                                                             | 0.74<br>(0.67; 0.82)      | 0.49<br>(0.24; 0.74)           | 0.76<br>(0.67; 0.85)      | 0.58<br>(0.37; 0.79)           | 0.74<br>(0.67; 0.82)      | 0.51<br>(0.35; 0.68)           | 0.70<br>(0.63; 0.76)      |
| Mean A-B+ B-C                | 0.60<br>(0.44; 0.75)                                                             | 0.62<br>(0.56; 0.68)      | 0.48<br>(0.23; 0.73)           | 0.76<br>(0.67; 0.85)      | 0.58<br>(0.37; 0.80)           | 0.75<br>(0.67; 0.82)      | 0.52<br>(0.36; 0.69)           | 0.70<br>(0.64; 0.76)      |
| Max A-B+ B-C                 | 0.60<br>(0.45; 0.75)                                                             | 0.61<br>(0.55; 0.68)      | 0.56<br>(0.33; 0.79)           | 0.76<br>(0.67; 0.84)      | 0.60<br>(0.40; 0.80)           | 0.74<br>(0.67; 0.81)      | 0.55<br>(0.39; 0.71)           | 0.70<br>(0.64; 0.76)      |

GW= gestational weeks

\*does not include late miscarriage

†includes late miscarriage

‡The endocervical length (distance A-B) was measured as a straight line from the external to the internal cervical os. If the isthmus was present, three distances were measured: the endocervical length (distance A-B), the isthmus length (distance B-C) and the distance A to C

§ number of preterm births
