# Supplementary material for: Second‐trimester transvaginal ultrasound measurement of cervical length for prediction of preterm birth: a blinded prospective multicentre diagnostic accuracy study
Source: PubMed Central journal article supplement (PMC7821210; doi:10.1111/1471-0528.16519), 2020-10-19
Supplement: BJO-128-195-s008.pdf [file BJO-128-195-s008.pdf]

**Table S6.** Shortest endocervical length (distance A-B) at 18+0 to 20+6 weeks (Cx1) and at 21+0 to 23+6 weeks (Cx2)

| Cervical length | Cx1<br>n=11 072 |      | Cx2<br>n=6288 |      |
|-----------------|-----------------|------|---------------|------|
|                 | n               | %    | n             | %    |
| ≤10 mm          | 7               | 0.06 | 6             | 0.10 |
| ≤15 mm          | 15              | 0.14 | 14            | 0.22 |
| 10-20 mm        | 61              | 0.55 | 65            | 1.03 |
| ≤20 mm          | 67              | 0.61 | 71            | 1.13 |
| ≤25 mm          | 441             | 3.98 | 274           | 4.36 |
| ≤30 mm          | 2175            | 19.6 | 1166          | 18.6 |
| ≤35 mm          | 5419            | 48.9 | 2925          | 46.5 |

1<sup>st</sup>, 5<sup>th</sup> and 10<sup>th</sup> percentiles at Cx1: 22 mm, 26 mm, 28 mm

1<sup>st</sup>, 5<sup>th</sup> and 10<sup>th</sup> percentiles at Cx2: 20 mm, 26 mm, 28 mm
