# Supplementary material for: Second‐trimester transvaginal ultrasound measurement of cervical length for prediction of preterm birth: a blinded prospective multicentre diagnostic accuracy study
Source: PubMed Central journal article supplement (PMC7821210; doi:10.1111/1471-0528.16519), 2020-10-19
Supplement: BJO-128-195-s009.pdf [file BJO-128-195-s009.pdf]

**Table S7.** Area under the Receiver Operating Characteristic curve for different cervical length measurements with regard to preterm birth <33 weeks excluding late miscarriage at 18+0 to 21+6 weeks (primary outcome) and with regard to spontaneous preterm birth including late miscarriage at 18+0 to 21+6 weeks for the study population with two cervical measurements: at 18+0 to 20+6 weeks and at 21+0 to 23+6 weeks with at least 14 days between the two measurements (Cx1Cx2)

| Cervical measurement*                        | Area under the Receiver Operating Characteristic curve (95% confidence interval) |                      |                      |                      |                      |                      |                      |                      |                      |                      |                      |
|----------------------------------------------|----------------------------------------------------------------------------------|----------------------|----------------------|----------------------|----------------------|----------------------|----------------------|----------------------|----------------------|----------------------|----------------------|
|                                              | Primary outcome                                                                  |                      |                      |                      |                      |                      |                      |                      |                      |                      |                      |
|                                              | PTB                                                                              | sPTB                 | sPTB                 | sPTB                 | sPTB                 | sPTB                 | sPTB                 | sPTB                 | sPTB                 | sPTB                 | sPTB                 |
|                                              | <33 GW†                                                                          | <28 GW               | <29 GW               | <30 GW               | <31 GW               | 32 GW                | <33 GW               | <34 GW               | <35 GW               | <36 GW               | <37 GW               |
|                                              | n=52                                                                             | n=3                  | n=5                  | n=10                 | n=15                 | n=18                 | n=26                 | n=40                 | n=67                 | n=109                | n=220                |
| <b>Cx1Cx2 (n = 6179)</b>                     |                                                                                  |                      |                      |                      |                      |                      |                      |                      |                      |                      |                      |
| Min A-B (Cx1)                                | 0.51<br>(0.42; 0.60)                                                             | 0.97<br>(0.94; 1.00) | 0.97<br>(0.95; 1.00) | 0.78<br>(0.58; 0.97) | 0.73<br>(0.56; 0.90) | 0.67<br>(0.51; 0.83) | 0.65<br>(0.53; 0.76) | 0.66<br>(0.57; 0.75) | 0.62<br>(0.56; 0.69) | 0.62<br>(0.56; 0.67) | 0.59<br>(0.55; 0.62) |
| Min A-C (Cx1)                                | 0.55<br>(0.46; 0.64)                                                             | 0.88<br>(0.77; 1.00) | 0.92<br>(0.85; 1.00) | 0.79<br>(0.64; 0.95) | 0.76<br>(0.61; 0.90) | 0.67<br>(0.51; 0.83) | 0.66<br>(0.54; 0.78) | 0.64<br>(0.54; 0.74) | 0.62<br>(0.54; 0.69) | 0.61<br>(0.55; 0.66) | 0.59<br>(0.56; 0.63) |
| Min A-B+B-C (Cx1)                            | 0.55<br>(0.46; 0.64)                                                             | 0.91<br>(0.77; 1.00) | 0.94<br>(0.86; 1.00) | 0.80<br>(0.64; 0.96) | 0.76<br>(0.61; 0.91) | 0.68<br>(0.51; 0.84) | 0.66<br>(0.54; 0.79) | 0.64<br>(0.53; 0.74) | 0.61<br>(0.54; 0.68) | 0.61<br>(0.55; 0.66) | 0.59<br>(0.55; 0.63) |
| Min A-B (Cx2)                                | 0.59<br>(0.50; 0.68)                                                             | 0.96<br>(0.92; 1.00) | 0.98<br>(0.95; 1.00) | 0.86<br>(0.69; 1.00) | 0.85<br>(0.72; 0.99) | 0.81<br>(0.68; 0.93) | 0.76<br>(0.65; 0.87) | 0.71<br>(0.63; 0.80) | 0.71<br>(0.64; 0.77) | 0.67<br>(0.62; 0.72) | 0.63<br>(0.59; 0.67) |
| Min A-C (Cx2)                                | 0.58<br>(0.49; 0.68)                                                             | 0.96<br>(0.93; 1.00) | 0.98<br>(0.95; 1.00) | 0.87<br>(0.71; 1.00) | 0.86<br>(0.73; 0.99) | 0.82<br>(0.71; 0.94) | 0.78<br>(0.68; 0.88) | 0.73<br>(0.65; 0.82) | 0.71<br>(0.65; 0.77) | 0.67<br>(0.61; 0.72) | 0.63<br>(0.60; 0.67) |
| Min A-B+B-C (Cx2)                            | 0.58<br>(0.49; 0.68)                                                             | 0.96<br>(0.93; 1.00) | 0.98<br>(0.95; 1.00) | 0.87<br>(0.71; 1.00) | 0.86<br>(0.74; 0.99) | 0.82<br>(0.71; 0.94) | 0.78<br>(0.68; 0.88) | 0.74<br>(0.65; 0.82) | 0.71<br>(0.65; 0.77) | 0.67<br>(0.61; 0.72) | 0.64<br>(0.60; 0.67) |
| Change Min A-B in mm between Cx1 and Cx2     | 0.60<br>(0.52; 0.69)                                                             | 0.54<br>(0.19; 0.90) | 0.68<br>(0.41; 0.94) | 0.71<br>(0.52; 0.91) | 0.69<br>(0.52; 0.86) | 0.69<br>(0.54; 0.84) | 0.67<br>(0.55; 0.79) | 0.60<br>(0.51; 0.70) | 0.63<br>(0.56; 0.69) | 0.58<br>(0.52; 0.63) | 0.56<br>(0.52; 0.60) |
| Change Min A-C in mm between Cx1 and Cx2     | 0.56<br>(0.48; 0.65)                                                             | 0.65<br>(0.35; 0.96) | 0.71<br>(0.51; 0.91) | 0.70<br>(0.53; 0.87) | 0.67<br>(0.51; 0.82) | 0.68<br>(0.54; 0.83) | 0.65<br>(0.53; 0.77) | 0.62<br>(0.52; 0.72) | 0.61<br>(0.54; 0.68) | 0.56<br>(0.50; 0.62) | 0.54<br>(0.50; 0.58) |
| Change Min A-B+B-C in mm between Cx1 and Cx2 | 0.57<br>(0.49; 0.65)                                                             | 0.65<br>(0.41; 0.89) | 0.71<br>(0.54; 0.87) | 0.70<br>(0.53; 0.86) | 0.66<br>(0.51; 0.82) | 0.68<br>(0.54; 0.82) | 0.65<br>(0.53; 0.76) | 0.62<br>(0.52; 0.71) | 0.61<br>(0.54; 0.68) | 0.56<br>(0.50; 0.62) | 0.54<br>(0.50; 0.58) |
| % Change Min A-B between Cx1 and Cx2         | 0.61<br>(0.52; 0.70)                                                             | 0.55<br>(0.10; 1.00) | 0.72<br>(0.40; 1.00) | 0.74<br>(0.53; 0.96) | 0.71<br>(0.53; 0.90) | 0.71<br>(0.55; 0.87) | 0.68<br>(0.56; 0.81) | 0.62<br>(0.51; 0.72) | 0.64<br>(0.56; 0.71) | 0.58<br>(0.52; 0.64) | 0.56<br>(0.52; 0.60) |
| % Change Min A-C between Cx1 and Cx2         | 0.57<br>(0.48; 0.66)                                                             | 0.69<br>(0.36; 1.00) | 0.78<br>(0.57; 1.00) | 0.76<br>(0.57; 0.94) | 0.71<br>(0.54; 0.88) | 0.72<br>(0.57; 0.87) | 0.68<br>(0.56; 0.81) | 0.64<br>(0.54; 0.75) | 0.63<br>(0.55; 0.70) | 0.57<br>(0.51; 0.63) | 0.54<br>(0.50; 0.58) |

GW=gestational weeks; PTB=preterm birth; sPTB=spontaneous preterm birth.

\*The endocervical length (distance A-B) was measured as a straight line from the external to the internal cervical os. If the isthmus was present, three distances were measured: the endocervical length (distance A-B), the isthmus length (distance B-C) and the distance A to C.

†late miscarriage at 18+0 to 21+6 weeks excluded
