# Supplementary material for: Second‐trimester transvaginal ultrasound measurement of cervical length for prediction of preterm birth: a blinded prospective multicentre diagnostic accuracy study
Source: PubMed Central journal article supplement (PMC7821210; doi:10.1111/1471-0528.16519), 2020-10-19
Supplement: BJO-128-195-s010.pdf [file BJO-128-195-s010.pdf]

**Table S8.** Discriminative ability in terms of positive and negative likelihood ratios, positive and negative predictive values for shortest endocervical length (distance A-B) measured at 18+0 to 20+6 gestational weeks (Cx1, n=11072) with regard to predicting spontaneous preterm birth including late spontaneous miscarriage

| sPTB    | Cervical length       |                        |                   |                           |                                  |                      |                   |                            |                                  |                       |                   |                           |                                  |                   |                   |                            |                                 | mm                 |
|---------|-----------------------|------------------------|-------------------|---------------------------|----------------------------------|----------------------|-------------------|----------------------------|----------------------------------|-----------------------|-------------------|---------------------------|----------------------------------|-------------------|-------------------|----------------------------|---------------------------------|--------------------|
|         | 0-15 mm (n=15; 0.14%) |                        |                   |                           |                                  | 0-20 mm (n=67; 0.6%) |                   |                            |                                  | 0-25 mm (n=441; 4.0%) |                   |                           |                                  | Best cut-off*     |                   |                            |                                 |                    |
|         | No. sPTB (%)          | LR+ [95% CI]           | LR; [95% CI]      | PPV [95% CI]              | NPV [95% CI]                     | LR+ [95% CI]         | LR; [95% CI]      | PPV [95% CI]               | NPV [95% CI]                     | LR+ [95% CI]          | LR; [95% CI]      | PPV [95% CI]              | NPV [95% CI]                     | LR+ [95% CI]      | LR; [95% CI]      | PPV [95% CI]               | NPV [95% CI]                    |                    |
| <28 GW  | 22 (0.20%)            | 125.57 [38.05; 414.42] | 0.86 [0.73; 1.02] | 3/15 (20.0%) [4.3; 48.1]  | 11038/11057 (99.8%) [99.7; 99.9] | 31.89 [12.71; 80.02] | 0.82 [0.68; 1.00] | 4/67 (6.0%) [1.7; 14.6]    | 10987/11005 (99.8%) [99.7; 99.9] | 10.46 [6.28; 17.44]   | 0.61 [0.43; 0.87] | 9/441 (2.0%) [0.9; 3.8]   | 10618/10631 (99.9%) [99.8; 99.9] | 2.69 [2.20; 3.28] | 0.26 [0.11; 0.63] | 18/3383 (0.5%) [0.3; 0.8]  | 7685/7689 (99.9%) [99.9; 100.0] | 32 (n=3383; 30.6%) |
| <29 GW  | 24 (0.22%)            | 115.08 [34.66; 382.13] | 0.88 [0.75; 1.02] | 3/15 (20.0%) [4.3; 48.1]  | 11036/11057 (99.8%) [99.7; 99.9] | 37.12 [16.38; 84.16] | 0.80 [0.65; 0.98] | 5/67 (7.5%) [2.5; 16.6]    | 10986/11005 (99.8%) [99.7; 99.9] | 10.68 [6.59; 17.30]   | 0.61 [0.43; 0.85] | 10/441 (2.3%) [1.1; 4.1]  | 10617/10631 (99.9%) [99.8; 99.9] | 2.74 [2.28; 3.28] | 0.24 [0.10; 0.59] | 20/3383 (0.6%) [0.4; 0.9]  | 7685/7689 (99.9%) [99.9; 100.0] | 32 (n=3383; 30.6%) |
| <30 GW  | 34 (0.31%)            | 81.16 [23.97; 274.79]  | 0.91 [0.82; 1.01] | 3/15 (20.0%) [4.3; 48.1]  | 11026/11057 (99.7%) [99.6; 99.8] | 26.18 [11.23; 61.05] | 0.86 [0.75; 0.99] | 5/67 (7.5%) [2.5; 16.6]    | 10976/11005 (99.7%) [99.6; 99.8] | 9.08 [5.71; 14.45]    | 0.67 [0.53; 0.86] | 12/441 (2.7%) [1.4; 4.7]  | 10609/10631 (99.8%) [99.7; 99.9] | 2.42 [1.97; 2.96] | 0.38 [0.22; 0.67] | 25/3383 (0.7%) [0.5; 1.1]  | 7680/7689 (99.9%) [99.8; 100.0] | 32 (n=3383; 30.6%) |
| <31 GW  | 40 (0.36%)            | 68.95 [20.22; 235.07]  | 0.93 [0.85; 1.01] | 3/15 (20.0%) [4.3; 48.1]  | 11020/11057 (99.7%) [99.5; 99.8] | 27.13 [12.45; 59.12] | 0.85 [0.75; 0.97] | 6/67 (9.0%) [3.4; 18.5]    | 10971/11005 (99.7%) [99.6; 99.8] | 8.38 [5.31; 13.22]    | 0.70 [0.57; 0.87] | 13/441 (2.9%) [1.6; 5.0]  | 10604/10631 (99.7%) [99.6; 99.8] | 2.38 [1.97; 2.89] | 0.40 [0.24; 0.65] | 29/3383 (0.9%) [0.6; 1.2]  | 7678/7689 (99.9%) [99.7; 99.9]  | 32 (n=3383; 30.6%) |
| <32 GW  | 46 (0.42%)            | 59.92 [17.49; 205.34]  | 0.94 [0.87; 1.01] | 3/15 (20.0%) [4.3; 48.1]  | 11014/11057 (99.6%) [99.5; 99.7] | 23.58 [10.73; 51.79] | 0.87 [0.78; 0.98] | 6/67 (9.0%) [3.4; 18.5]    | 10965/11005 (99.6%) [99.5; 99.7] | 7.86 [5.03; 12.28]    | 0.72 [0.60; 0.88] | 14/441 (3.2%) [1.8; 5.3]  | 10599/10631 (99.7%) [99.6; 99.8] | 3.41 [2.55; 4.57] | 0.59 [0.44; 0.78] | 23/1638 (1.4%) [0.9; 2.1]  | 9411/9434 (99.8%) [99.6; 99.9]  | 29 (n=1638; 14.8%) |
| <33 GW  | 63 (0.57%)            | 43.69 [12.63; 151.07]  | 0.95 [0.90; 1.01] | 3/15 (20.0%) [4.3; 48.1]  | 10997/11057 (99.5%) [99.3; 99.6] | 20.39 [9.70; 42.84]  | 0.89 [0.82; 0.98] | 7/67 (10.4%) [4.3; 20.4]   | 10949/11005 (99.5%) [99.3; 99.6] | 7.01 [4.62; 10.63]    | 0.76 [0.65; 0.88] | 17/441 (3.9%) [2.3; 6.1]  | 10585/10631 (99.6%) [99.4; 99.7] | 2.93 [2.19; 3.91] | 0.67 [0.54; 0.83] | 27/1638 (1.6%) [1.1; 2.4]  | 9398/9434 (99.9%) [99.5; 99.7]  | 29 (n=1638; 14.8%) |
| <33 GW† | 56 (0.51%†)           | 16.38 [2.17; 123.86]   | 0.98 [0.95; 1.02] | 1/13 (7.7%) [0.2; 36.0]   | 10996/11051 (99.5%) [99.4; 99.6] | 16.38 [6.84; 39.25]  | 0.92 [0.84; 0.99] | 5/65 (7.7%) [2.5; 17.1]    | 10948/10999 (99.5%) [99.4; 99.7] | 6.03 [3.71; 9.79]     | 0.80 [0.69; 0.92] | 13/437 (3.0%) [1.6; 5.0]  | 10584/10627 (99.6%) [99.5; 99.7] | 1.61 [1.34; 1.93] | 0.56 [0.38; 0.81] | 38/4682 (0.8%) [0.6; 1.1]  | 6364/6382 (99.7%) [99.6; 99.8]  | 34 (n=4682; 42.3%) |
| <34 GW  | 94 (0.85%)            | 29.20 [8.38; 101.78]   | 0.97 [0.93; 1.01] | 3/15 (20.0%) [4.3; 48.1]  | 10966/11057 (99.2%) [99.0; 99.3] | 13.63 [6.40; 29.02]  | 0.93 [0.88; 0.99] | 7/67 (10.4%) [4.3; 20.4]   | 10918/11005 (99.2%) [99.0; 99.4] | 5.55 [3.72; 8.28]     | 0.82 [0.74; 0.91] | 20/441 (4.5%) [2.8; 6.9]  | 10557/10631 (99.3%) [99.1; 99.5] | 2.55 [1.95; 3.33] | 0.73 [0.63; 0.86] | 35/1638 (2.1%) [1.5; 3.0]  | 9375/9434 (99.4%) [99.2; 99.5]  | 29 (n=1638; 14.8%) |
| <35 GW  | 143 (1.29%)           | 27.79 [8.96; 86.24]    | 0.97 [0.95; 1.00] | 4/15 (26.7%) [7.8; 55.1]  | 10918/11057 (98.7%) [98.5; 98.9] | 10.36 [5.05; 21.29]  | 0.95 [0.91; 0.99] | 8/67 (11.9%) [5.3; 22.2]   | 10870/11005 (98.8%) [98.6; 99.0] | 4.01 [2.70; 5.96]     | 0.88 [0.82; 0.94] | 22/441 (5.0%) [3.2; 7.5]  | 10510/10631 (98.9%) [98.6; 99.1] | 1.59 [1.34; 1.89] | 0.74 [0.63; 0.87] | 69/3383 (2.0%) [1.6; 2.6]  | 7615/7689 (99.0%) [98.8; 99.2]  | 32 (n=3383; 30.6%) |
| <36 GW  | 226 (2.04%)           | 17.45 [5.60; 54.39]    | 0.98 [0.97; 1.00] | 4/15 (26.7%) [7.8; 55.1]  | 10835/11057 (98.0%) [97.7; 98.3] | 7.45 [3.74; 14.84]   | 0.97 [0.94; 0.99] | 9/67 (13.4%) [6.3; 24.0]   | 10788/11005 (98.0%) [97.8; 98.3] | 3.50 [2.48; 4.95]     | 0.90 [0.86; 0.95] | 30/441 (6.8%) [4.6; 9.6]  | 10435/10631 (98.2%) [97.9; 98.4] | 1.45 [1.28; 1.65] | 0.75 [0.65; 0.86] | 118/4013 (2.9%) [2.4; 3.5] | 6951/7059 (98.5%) [98.2; 98.7]  | 33 (n=4013; 36.2%) |
| <37 GW  | 417 (3.77%)           | 12.78 [4.39; 37.21]    | 0.99 [0.98; 1.00] | 5/15 (33.3%) [11.8; 61.6] | 10645/11057 (96.3%) [95.9; 96.6] | 6.15 [3.38; 11.18]   | 0.99 [0.98; 1.00] | 13/67 (19.4%) [10.8; 30.9] | 10601/11005 (96.3%) [96.0; 96.7] | 2.41 [1.75; 3.31]     | 0.94 [0.92; 0.97] | 38/441 (8.6%) [6.2; 11.6] | 10252/10631 (96.4%) [96.1; 96.8] | 1.39 [1.26; 1.54] | 0.78 [0.71; 0.86] | 207/4013 (5.2%) [4.5; 5.9] | 6849/7059 (97.0%) [96.6; 97.4]  | 33 (n=4013; 36.2%) |

GW=gestational weeks. sPTB=spontaneous preterm birth including miscarriage. No=number of. AUC=area under receiver operating characteristic curve. CI=confidence interval. LR+=positive likelihood ratio. LR-=negative likelihood ratio. PPV=positive predictive value. NPV=negative predictive value.

\* best cut-off is the cut-off associated with the largest number of correctly classified cases and is calculated using Youden's index<sup>21</sup>

† late miscarriage excluded, n=11064 as denominator
