# Supplementary material for: Second‐trimester transvaginal ultrasound measurement of cervical length for prediction of preterm birth: a blinded prospective multicentre diagnostic accuracy study
Source: PubMed Central journal article supplement (PMC7821210; doi:10.1111/1471-0528.16519), 2020-10-19
Supplement: BJO-128-195-s012.pdf [file BJO-128-195-s012.pdf]

**Table S10.** Discriminative ability of shortest endocervical length (distance A-B) 0-30 mm measured at 18+0 to 20+6 gestational weeks (Cx1) with regard to predicting spontaneous preterm birth including late spontaneous miscarriage

| <b>Cx1 (n=11072)</b>                                        |                 |                         |                                    |                                       |                       |                         |                         |                                  |                                       |
|-------------------------------------------------------------|-----------------|-------------------------|------------------------------------|---------------------------------------|-----------------------|-------------------------|-------------------------|----------------------------------|---------------------------------------|
| <b>Shortest endocervical length 0-30 mm (n=2175; 19.6%)</b> |                 |                         |                                    |                                       |                       |                         |                         |                                  |                                       |
| <b>sPTB</b>                                                 | <b>No. sPTB</b> | <b>AUC<br/>(95% CI)</b> | <b>Sensitivity<br/>[95% CI]</b>    | <b>Specificity<br/>[95% CI]</b>       | <b>FP/TP;<br/>NNS</b> | <b>LR+<br/>[95% CI]</b> | <b>LR-<br/>[95% CI]</b> | <b>PPV<br/>[95% CI]</b>          | <b>NPV<br/>[95% CI]</b>               |
| <b>&lt;28 GW</b>                                            | 22<br>(0.20%)   | 0.83<br>(0.74; 0.92)    | 14/22<br>(63.6%)<br>[40.7; 82.8]   | 8889/11050<br>(80.4%)<br>[79.7; 81.2] | 154;<br>791           | 3.25<br>[2.37; 4.47]    | 0.45<br>[0.26; 0.79]    | 14/2175<br>(0.6%)<br>[0.4; 1.1]  | 8889/8897<br>(99.9%)<br>[99.8; 100.0] |
| <b>&lt;29 GW</b>                                            | 24<br>(0.22%)   | 0.84<br>(0.76; 0.92)    | 16/24<br>(66.7%)<br>[44.7; 84.4]   | 8889/11048<br>(80.5%)<br>[79.7; 81.2] | 135;<br>692           | 3.41<br>[2.56; 4.54]    | 0.41<br>[0.24; 0.73]    | 16/2175<br>(0.7%)<br>[0.4-1.2]   | 8889/8897<br>(99.9%)<br>[99.8; 100.0] |
| <b>&lt;30 GW</b>                                            | 34<br>(0.31%)   | 0.77<br>(0.68; 0.87)    | 21/34<br>(61.8%)<br>[43.6; 77.8]   | 8884/11038<br>(80.5%)<br>[79.7; 81.2] | 103;<br>527           | 3.17<br>[2.42; 4.13]    | 0.48<br>[0.31; 0.73]    | 21/2175<br>(1.0%)<br>[0.6; 1.5]  | 8884/8897<br>(99.9%)<br>[99.8; 99.9]  |
| <b>&lt;31 GW</b>                                            | 40<br>(0.36%)   | 0.76<br>(0.67; 0.85)    | 24/40<br>(60.0%)<br>[43.3; 75.1]   | 8881/11032<br>(80.5%)<br>[79.8; 81.2] | 90;<br>461            | 3.08<br>[2.38; 3.97]    | 0.50<br>[0.34; 0.73]    | 24/2175<br>(1.1%)<br>[0.7; 1.6]  | 8881/8897<br>(99.8%)<br>[99.7; 99.9]  |
| <b>&lt;32 GW</b>                                            | 46<br>(0.42%)   | 0.71<br>(0.62; 0.80)    | 25/46<br>(54.3%)<br>[39.0; 69.1]   | 8876/11026<br>(80.5%)<br>[79.8; 81.2] | 86;<br>443            | 2.79<br>[2.13; 3.64]    | 0.57<br>[0.41; 0.78]    | 25/2175<br>(1.1%)<br>[0.8; 1.7]  | 8876/8897<br>(99.8%)<br>[99.6-; 9.9]  |
| <b>&lt;33 GW</b>                                            | 63<br>(0.57%)   | 0.68<br>(0.60; 0.76)    | 29/63<br>(46.0%)<br>[33.4; 59.1]   | 8863/11009<br>(80.5%)<br>[79.8; 81.2] | 74;<br>382            | 2.36<br>[1.80; 3.09]    | 0.67<br>[0.53; 0.84]    | 29/2175<br>(1.3%)<br>[0.9; 1.9]  | 863/8897<br>(99.6%)<br>[99.5; 99.7]   |
| <b>&lt;33 GW†</b>                                           | 56<br>(0.51%†)  | 0.66<br>(0.58; 0.74)    | 23/56<br>(41.1%)<br>[28.1; 55.0]   | 8862/11008<br>(80.5%)<br>[79.8; 81.2] | 93;<br>481            | 2.11<br>[1.54; 2.89]    | 0.73<br>[0.59; 0.91]    | 23/2169<br>(1.1%)<br>[0.7; 1.6]  | 8862/8895<br>(99.6%)<br>[99.5; 99.7]  |
| <b>&lt;34 GW</b>                                            | 94<br>(0.85%)   | 0.65<br>(0.59; 0.72)    | 39/94<br>(41.5%)<br>[31.4; 52.1]   | 8842/10978<br>(80.5%)<br>[79.8; 81.3] | 55;<br>284            | 2.13<br>[1.67; 2.72]    | 0.73<br>[0.61; 0.86]    | 39/2175<br>(1.8%)<br>[1.3; 2.4]  | 8842/8897<br>(99.4%)<br>[99.2; 99.5]  |
| <b>&lt;35 GW</b>                                            | 143<br>(1.29%)  | 0.62<br>(0.57; 0.67)    | 50/143'<br>(35.0%)<br>[27.2; 43.4] | 8804/10929<br>[80.6%]<br>[79.8; 81.3] | 43;<br>221            | 1.80<br>[1.43; 2.26]    | 0.81<br>[0.72; 0.91]    | 50/2175<br>(2.3%)<br>[1.7; 3.0]  | 8804/8897<br>(99.0%)<br>[98.7; 99.2]  |
| <b>&lt;36 GW</b>                                            | 226<br>(2.04%)  | 0.61<br>(0.57; 0.65)    | 76/226<br>(33.6%)<br>[27.5; 40.2]  | 8747/10846<br>[80.6%]<br>[79.9; 81.4] | 28;<br>146            | 1.74<br>[1.44; 2.10]    | 0.82<br>[0.75; 0.90]    | 76/2175<br>(3.5%)<br>[2.8; 4.4]  | 8747/8897<br>(98.3%)<br>[98.0; 98.6]  |
| <b>&lt;37 GW</b>                                            | 417<br>(3.77%)  | 0.60<br>(0.57; 0.63)    | 130/417<br>(31.2%)<br>[26.8; 35.9] | 8610/10655<br>[80.8%]<br>[80.1; 81.6] | 16;<br>85             | 1.62<br>[1.40; 1.88]    | 0.85<br>[0.80; 0.91]    | 130/2175<br>(6.0%)<br>[5.0; 7.1] | 8610/8897<br>(96.8%)<br>[96.4; 97.1]  |

GW=gestational weeks. sPTB=spontaneous preterm birth including late miscarriage. No.=number of. AUC=area under receiver operating characteristic curve. CI=confidence interval. FP=false positive. TP=true positive. NNS=number needed to screen, i.e. number of women needed to screen to detect one true positive test result. LR+ = positive likelihood ratio. LR- = negative likelihood ratio. PPV=positive predictive value. NPV=negative predictive value.

† late miscarriage excluded, n=11064 as denominator for Cx1
