# Supplementary material for: Second‐trimester transvaginal ultrasound measurement of cervical length for prediction of preterm birth: a blinded prospective multicentre diagnostic accuracy study
Source: PubMed Central journal article supplement (PMC7821210; doi:10.1111/1471-0528.16519), 2020-10-19
Supplement: BJO-128-195-s013.pdf [file BJO-128-195-s013.pdf]

**Table S11.** Discriminative ability of shortest endocervical length (distance A-B) 0-30 mm measured at 21+0 to 23+6 gestational weeks (Cx2) with regard to predicting spontaneous preterm birth

| <b>Cx2 [n=6288]</b>                                         |                |                      |                                   |                                      |               |                      |                      |                                 |                                        |
|-------------------------------------------------------------|----------------|----------------------|-----------------------------------|--------------------------------------|---------------|----------------------|----------------------|---------------------------------|----------------------------------------|
| <b>Shortest endocervical length 0-30 mm (n=1168; 18.6%)</b> |                |                      |                                   |                                      |               |                      |                      |                                 |                                        |
| sPTB                                                        | No. sPTB       | AUC<br>(95% CI)      | Sensitivity<br>[95% CI]           | Specificity<br>[95% CI]              | FP/TP;<br>NNS | LR+<br>[95% CI]      | LR-<br>[95% CI]      | PPV<br>[95% CI]                 | NPV<br>[95% CI]                        |
| <28 GW                                                      | 3<br>(0.05%)   | 0.96<br>(0.92; 1.00) | 3/3<br>(100%)<br>[29.2; 100]      | 5120/6285<br>(81.5%)<br>[80.5; 82.4] | 388;<br>2096  | 5.39<br>[5.12; 5.68] | NA                   | 3/1168<br>(0.3%)<br>(0.1; 0.8)  | 5120/5120<br>(100.0%)<br>(99.9; 100.0) |
| <29 GW                                                      | 5<br>(0.08%)   | 0.98<br>(0.95; 1.00) | 5/5<br>(100%)<br>[47.8; 100]      | 5120/6283<br>(81.5%)<br>[80.5; 82.4] | 233;<br>1258  | 5.40<br>[5.13; 5.69] | NA                   | 5/1168<br>(0.4%)<br>(0.1; 1.0)  | 5120/5120<br>(100.0%)<br>(99.9; 100.0) |
| <30 GW                                                      | 10<br>(0.16%)  | 0.86<br>(0.69; 1.00) | 8/10<br>(80.0%)<br>[44.7; 97.5]   | 5118/6278<br>(81.5%)<br>[80.5; 82.5] | 145;<br>786   | 4.33<br>[3.16; 5.93] | 0.25<br>[0.07; 0.85] | 8/1168<br>(0.7%)<br>(0.3; 1.4)  | 5118/5120<br>(100.0%)<br>(99.9; 100.0) |
| <31 GW                                                      | 15<br>(0.24%)  | 0.85<br>(0.72; 0.99) | 12/15<br>(80.0%)<br>[51.9; 95.7]  | 5117/6273<br>(81.6%)<br>[80.6; 82.5] | 96;<br>524    | 4.34<br>[3.35; 5.62] | 0.25<br>[0.09; 0.67] | 12/1168<br>(1.0%)<br>(0.5; 1.8) | 5117/5120<br>(99.9%)<br>(99.8; 100.0)  |
| <32 GW                                                      | 18<br>(0.29%)  | 0.81<br>(0.68; 0.93) | 12/18<br>(66.7%)<br>[41.0; 86.7]  | 5114/6270<br>(81.6%)<br>[80.6; 82.5] | 96;<br>524    | 3.62<br>[2.60; 5.03] | 0.41<br>[0.21; 0.79] | 12/1168<br>(1.0%)<br>(0.5; 1.8) | 5114/5120<br>(99.9%)<br>(99.8; 100.0)  |
| <33 GW                                                      | 26<br>(0.41%)  | 0.76<br>(0.65; 0.87) | 15/26<br>(57.7%)<br>[36.9; 76.7]  | 5109/6262<br>(81.6%)<br>[80.6; 82.5] | 77;<br>419    | 3.13<br>[2.25; 4.37] | 0.52<br>[0.33; 0.81] | 15/1168<br>(1.3%)<br>(0.7; 2.1) | 5109/5120<br>(99.8%)<br>(99.6; 99.9)   |
| <34 GW                                                      | 41<br>(0.65%)  | 0.71<br>(0.63; 0.80) | 20/41<br>(48.8%)<br>[32.9; 64.9]  | 5099/6247<br>(81.6%)<br>[80.6; 82.6] | 57;<br>314    | 2.65<br>[1.93; 3.65] | 0.63<br>[0.47; 0.85] | 20/1168<br>(1.7%)<br>(1.1; 2.6) | 5099/5120<br>(99.6%)<br>(99.4; 99.8)   |
| <35 GW                                                      | 69<br>(1.10%)  | 0.71<br>(0.65; 0.77) | 31/69<br>(44.9%)<br>[32.9; 57.4]  | 5082/6219<br>(81.7%)<br>[80.7; 82.7] | 37;<br>203    | 2.46<br>[1.88; 3.21] | 0.67<br>[0.54; 0.83] | 31/1168<br>(2.7%)<br>(1.8; 3.8) | 5082/5120<br>(99.3%)<br>(99.0; 99.5)   |
| <36 GW                                                      | 114<br>(1.81%) | 0.67<br>(0.61; 0.72) | 42/114<br>(36.8%)<br>[28.0; 46.4] | 5048/6174<br>(81.8%)<br>[80.8; 82.7] | 27;<br>150    | 2.02<br>[1.58; 2.58] | 0.77<br>[0.67; 0.89] | 42/1168<br>(3.6%)<br>(2.6; 4.8) | 5048/5120<br>(98.6%)<br>(98.2; 98.9)   |
| <37 GW                                                      | 225<br>(3.58%) | 0.63<br>(0.59; 0.67) | 73/225<br>(32.4%)<br>[26.4; 39.0] | 4968/6063<br>(81.9%)<br>[81.0; 82.9] | 15;<br>86     | 1.80<br>[1.48; 2.19] | 0.82<br>[0.75; 0.90] | 73/1168<br>(6.3%)<br>(4.9; 7.8) | 4968/5120<br>(97.0%)<br>(96.5; 97.5)   |

GW=gestational weeks. sPTB=spontaneous preterm birth. No.=number of. AUC=area under receiver operating characteristic curve. CI=confidence interval. FP=false positive. TP=true positive. NNS=number needed to screen, i.e. number of women needed to screen to detect one true positive test result. NA, not applicable (100% sensitivity). LR+ = positive likelihood ratio. LR- = negative likelihood ratio. PPV=positive predictive value. NPV=negative predictive value.

There were no late miscarriages in the Cx2 group
